# Supplementary material for: Sugar-sweetened beverage consumption: a risk factor for prevalent gout with SLC2A9 genotype-specific effects on serum urate and risk of gout
Source: HighWire-hosted journal article supplement (doi:10.1136/annrheumdis-2013-203600), 2013-09-12
Supplement: annrheumdis-2013-203600supp.pdf [file annrheumdis-2013-203600supp.pdf]

## SUPPLEMENTAL MATERIAL

### **Sugar-sweetened beverage consumption: A risk factor for prevalent gout that interacts with *SLC2A9* genotype in a non-additive fashion**

Caitlin Batt<sup>1^</sup>, Amanda J Phipps-Green<sup>1^</sup>, Michael A Black<sup>1</sup>, Murray Cadzow<sup>1</sup>, Marilyn E Merriman<sup>1</sup>, Ruth Topless<sup>1</sup>, Peter Gow<sup>2</sup>, Andrew Harrison<sup>3</sup>, John Highton<sup>4</sup>, Peter Jones<sup>5</sup>, Lisa Stamp<sup>6</sup>, Nicola Dalbeth<sup>5</sup>, Tony R Merriman<sup>1\*</sup>

<sup>1</sup>Department of Biochemistry, University of Otago, Dunedin, NZ; <sup>2</sup>Department of Rheumatology, Middlemore Hospital, Auckland, NZ; <sup>3</sup>Department of Medicine, University of Otago, Wellington, NZ; <sup>4</sup>Department of Medicine, University of Otago, Dunedin, NZ; <sup>5</sup>Department of Medicine, University of Auckland, Auckland, NZ; <sup>6</sup>Department of Medicine, University of Otago, Christchurch, NZ.

<sup>^</sup>These authors contributed equally to the work.

\*Address correspondence to Tony R. Merriman, E-mail: [tony.merriman@otago.ac.nz](mailto:tony.merriman@otago.ac.nz).

## **Subjects and Methods**

### *Data collection*

New Zealand participants were asked their normal daily sugar-sweetened beverage (SSB) intake (“How many cans or large glasses (~300 ml) of sugar-sweetened drinks, including fruit juice but excluding diet drinks, do you normally drink per day?”) on a scale of 0,1,2,3,4,5 or more than 5. In the analysis, seven categories of SSB were created; 0, 0-1, 1, 2, 3, 4, 5 or more cans or large glasses of a sugar-sweetened drink per day (the 0-1 category allowed for people who voluntarily reported less than one serving per week). Although these data were not validated by diet records, they were comparable to survey data from South Australia where 11.6% of adults consumed  $\geq 0.5$  litres of soft-drink (excluding fruit juice) per day (1) - in the NZ European Caucasian control sample set 18.9% of participants reported drinking  $\geq 2$  ( $\geq 600$  millilitres) SSB (including fruit juice) per day. Average SSB/day was 0.94 in NZ European Caucasian controls, 1.46 in Māori controls and 2.04 in Pacific Island controls. In questions 11, 64 and 65 of Exam One ARIC participants were asked how many “Orange or grapefruit juice; 1 glass”, “Regular soft drinks, such as Coke, Pepsi, 7-Up, ginger ale; 1 glass” and “Fruit-flavored punch or non-carbonated beverages, such as lemonade, Kool-Aid or Hawaiian Punch; not diet; 1 glass”, respectively, they had consumed in 9 categories ranging from “almost never” to  $>6$ /day. The consumption derived from responses to the 3 questions were combined and converted into SSB categories equivalent to those used for the NZ data. Data from artificially-sweetened soft drinks were derived from question 63, how many “Low calorie soft drinks, such as diet Coke, diet Pepsi, diet 7-Up; 1 glass” (data on artificially-sweetened soft drink consumption were not available in the NZ sample sets) and combined in categories equivalent to the SSB exposure data.

New Zealand participants were asked “How many pieces of whole fresh fruit do you usually eat per day?”. Fruit consumption in ARIC, self-reported in Exam One, were combined from questions 9, 10,

12-14 (apples, oranges, peaches, apricots, plums, bananas, other fruits). NZ participants self-reported the amount of alcoholic drinks (beer, wine, spirits) consumed in the previous week. Similarly, ARIC participants self-reported weekly beer, wine and liquor consumption at Exam One (questions 96-98). Fruit and alcohol consumption were summed into a per day continuous variable.

New Zealand subjects also self-reported other metabolic medical conditions (hypertension and kidney problems). Serum urate was measured in NZ participants using the Trinder assay with a Roche Modular P (Hitachi) analyzer. From the ARIC data, urate measurements at Exam One were used, and anthropomorphic and blood pressure data were available from Exam One and kidney disease status from Exam Three (1993-1994). In the ARIC cohort, determination of gout status from Exam Four (not available at Exam One), 9 years after the exposure data were collected at Exam One, means it is likely that some cases were not diagnosed with gout when the exposure data were collected.

Genotyping of SLC2A9 single nucleotide polymorphism *rs11942223* was done using TaqMan SNP genotyping assay technology (Applied Biosystems) over the NZ samples. The ARIC samples had previously been genotyped for surrogate marker *rs6449173* using the Affymetrix 6.0 platform.

## References

1. Shi Z, Dal Grande E, Taylor AW, Gill TK, Adams R, Wittert G. Association between soft drink consumption and asthma and chronic obstructive pulmonary disease among adults in Australia. *Respirology*. 2012;17:363-369.

**Supplemental Table 1** Baseline characteristics by sugar-sweetened beverage intake.

|                                            | Controls            |                     |                     |                     |                     |                     |                     |                                   | Frequency of SSB (servings/day) |                     |                     |                     |                     |                     |                     |                          | Cases |  |  |  |  |  |  |  |
|--------------------------------------------|---------------------|---------------------|---------------------|---------------------|---------------------|---------------------|---------------------|-----------------------------------|---------------------------------|---------------------|---------------------|---------------------|---------------------|---------------------|---------------------|--------------------------|-------|--|--|--|--|--|--|--|
|                                            | 0                   | 0.1-0.9             | 1-1.9               | 2-2.9               | 3-3.9               | 4-4.9               | 5+                  | $\beta$ (P) <sup>†</sup>          | 0                               | 0.1-0.9             | 1-1.9               | 2-2.9               | 3-3.9               | 4-4.9               | 5+                  | $\beta$ (P) <sup>†</sup> |       |  |  |  |  |  |  |  |
| <b>NZ Caucasian</b>                        |                     |                     |                     |                     |                     |                     |                     |                                   |                                 |                     |                     |                     |                     |                     |                     |                          |       |  |  |  |  |  |  |  |
| Number of individuals (%)                  | 96<br>(53.3%)       | 2<br>(1.1%)         | 48<br>(26.7%)       | 13<br>(7.2%)        | 12<br>(6.7%)        | 2<br>(1.1%)         | 7<br>(3.9%)         | -                                 | 220<br>(53.4%)                  | 7<br>(1.7%)         | 87<br>(21.1%)       | 45<br>(10.9%)       | 18<br>(4.4%)        | 18<br>(4.4%)        | 17<br>(4.1%)        | -                        |       |  |  |  |  |  |  |  |
| Age, mean (range), years                   | 47<br>(18-79)       | 57<br>(56-58)       | 44<br>(17-68)       | 38<br>(18-53)       | 34<br>(19-56)       | 34<br>(21-46)       | 44<br>(29-66)       | -3.211<br>(1.2x10 <sup>-3</sup> ) | 65<br>(23-93)                   | 58<br>(47-82)       | 63<br>(23-91)       | 62<br>(27-85)       | 58<br>(23-94)       | 62<br>(38-85)       | 58<br>(28-81)       | -0.842<br>(0.055)        |       |  |  |  |  |  |  |  |
| Sex, % male                                | 43.8%               | 50.0%               | 47.9%               | 38.5%               | 66.7%               | 50.0%               | 57.1%               | -0.076<br>(0.016)                 | 72.0%                           | 100%                | 74.7%               | 91.1%               | 88.9%               | 88.9%               | 100%                | -0.033<br>(0.016)        |       |  |  |  |  |  |  |  |
| BMI, mean (range)                          | 28.4<br>(19.6-62.7) | 28.0<br>(25.0-31.1) | 27.3<br>(19.5-37.1) | 28.2<br>(22.0-37.0) | 28.4<br>(20.9-56.3) | 43.8<br>(29.5-58)   | 30.3<br>(23.1-39.1) | 0.916<br>(0.037)                  | 29.9<br>(19.2-60.7)             | 34.7<br>(24.4-61.4) | 29.7<br>(20.1-42.0) | 29.6<br>(22.0-40.1) | 29.4<br>(22.4-36.6) | 28.9<br>(22.3-36.8) | 30.0<br>(21.3-37.7) | -0.167<br>(0.349)        |       |  |  |  |  |  |  |  |
| Uric acid, mean (range)                    | 0.27<br>(0.13-0.52) | 0.27<br>(0.22-0.32) | 0.31<br>(0.18-0.48) | 0.30<br>(0.18-0.42) | 0.33<br>(0.21-0.44) | 0.30                | 0.30<br>(0.20-0.66) | 0.012<br>(0.029)                  | 0.39<br>(0.13-0.66)             | -                   | 0.38<br>(0.19-0.63) | 0.44<br>(0.28-0.65) | 0.36<br>(0.20-0.64) | 0.42<br>(0.25-0.69) | 0.41<br>(0.23-0.60) | 0.006<br>(0.241)         |       |  |  |  |  |  |  |  |
| Alcohol intake, mean servings/week (range) | 5.9<br>(0-30)       | 6.0<br>(6)          | 6.3<br>(0-30)       | 5.4<br>(0-24)       | 4.8<br>(0-13)       | 0<br>(0)            | 13<br>(0-48)        | 0.288<br>(0.554)                  | 6.5<br>(0-35)                   | 8.3<br>(2-17)       | 6.9<br>(0-35)       | 8.7<br>(0-41)       | 13.6<br>(0-84)      | 8.6<br>(0-40)       | 8.5<br>(0-34)       | 0.329<br>(0.317)         |       |  |  |  |  |  |  |  |
| Kidney problems, %                         | 3.2%                | 0%                  | 0%                  | 0%                  | 0%                  | 0%                  | 0%                  | -0.007<br>(0.429)                 | 18.5%                           | 0%                  | 16.7%               | 18.2%               | 11.8%               | 22.2%               | 17.7%               | 0.008<br>(0.528)         |       |  |  |  |  |  |  |  |
| High blood pressure, %                     | 12.6%               | 0%                  | 8.9%                | 0%                  | 8.3%                | 0%                  | 14.3%               | -0.024<br>(0.204)                 | 52.8%                           | 14.3%               | 53.5%               | 48.9%               | 44.4%               | 38.9%               | 29.4%               | -0.015<br>(0.375)        |       |  |  |  |  |  |  |  |
| <b>NZ Māori</b>                            |                     |                     |                     |                     |                     |                     |                     |                                   |                                 |                     |                     |                     |                     |                     |                     |                          |       |  |  |  |  |  |  |  |
| Number of individuals (%)                  | 120<br>(38.5%)      | 7<br>(2.2%)         | 78<br>(25.0%)       | 37<br>(11.9%)       | 25<br>(8.0%)        | 14<br>(4.5%)        | 31<br>(9.9%)        | -                                 | 75<br>(39.5%)                   | 5<br>(2.6%)         | 32<br>(16.8%)       | 16<br>(8.4%)        | 19<br>(10.0%)       | 17<br>(9.0%)        | 26<br>(13.7%)       | -                        |       |  |  |  |  |  |  |  |
| Age, mean (range), years                   | 48<br>(18-75)       | 48<br>(40-63)       | 40<br>(18-80)       | 38<br>(18-67)       | 40<br>(17-66)       | 34<br>(20-49)       | 39<br>(17-65)       | -1.768<br>(3.7x10 <sup>-3</sup> ) | 59<br>(25-81)                   | 54<br>(45-64)       | 52<br>(30-81)       | 51<br>(26-77)       | 52<br>(23-69)       | 49<br>(31-68)       | 50<br>(33-74)       | -1.239<br>(0.003)        |       |  |  |  |  |  |  |  |
| Sex, % male                                | 26.3%               | 42.9%               | 26.9%               | 37.8%               | 60.0%               | 28.6%               | 48.4%               | -0.039<br>(0.020)                 | 69.3%                           | 100%                | 81.3%               | 86.7%               | 94.4%               | 88.2%               | 88.5%               | -0.026<br>(0.082)        |       |  |  |  |  |  |  |  |
| BMI, mean (range)                          | 31.6<br>(20.8-62.5) | 35.1<br>(28.8-40.3) | 31.9<br>(21.4-77.0) | 31.4<br>(19.4-56.8) | 33.5<br>(19.4-46.4) | 33.6<br>(24.8-44.9) | 33.3<br>(18.1-59.8) | 0.320<br>(0.224)                  | 34.8<br>(22.1-72.7)             | 36.4<br>(26.8-50.6) | 34.2<br>(23.2-62.1) | 32.5<br>(21.7-42.1) | 36.5<br>(24.6-51.6) | 36.1<br>(27.1-46.5) | 36.3<br>(23.1-48.3) | 0.051<br>(0.864)         |       |  |  |  |  |  |  |  |
| Uric acid, mean (range)                    | 0.32<br>(0.15-0.55) | 0.37<br>(0.31-0.40) | 0.32<br>(0.15-0.53) | 0.35<br>(0.21-0.58) | 0.39<br>(0.20-0.67) | 0.36<br>(0.24-0.47) | 0.36<br>(0.19-0.54) | 0.005<br>(0.101)                  | 0.40<br>(0.11-0.67)             | 0.40<br>(0.23-0.59) | 0.41<br>(0.25-0.59) | 0.42<br>(0.19-0.61) | 0.46<br>(0.23-0.60) | 0.42<br>(0.28-0.57) | 0.42<br>(0.26-0.55) | 0.002<br>(0.659)         |       |  |  |  |  |  |  |  |
| Alcohol intake, mean servings/week (range) | 3.3<br>(0-35)       | 0.6<br>(0-3)        | 6.0<br>(0-66)       | 3.8<br>(0-30)       | 7.8<br>(0-60)       | 3.9<br>(0-24)       | 3.1<br>(0-17)       | -0.274<br>(0.319)                 | 6.0<br>(0-120)                  | 6.2<br>(0-50)       | 8.0<br>(0-50)       | 4.3<br>(0-15)       | 4.7<br>(0-24)       | 7.5<br>(0-50)       | 9.6<br>(0-96)       | -0.138<br>(0.811)        |       |  |  |  |  |  |  |  |
| Kidney problems, %                         | 4.4%                | 0%                  | 2.6%                | 0%                  | 0%                  | 0%                  | 3.3%                | -0.003<br>(0.515)                 | 17.8%                           | 25.0%               | 21.9%               | 12.5%               | 31.6%               | 11.8%               | 13.0%               | 0.003<br>(0.838)         |       |  |  |  |  |  |  |  |
| High blood pressure, %                     | 20.0%               | 42.9%               | 15.4%               | 8.1%                | 17.4%               | 0%                  | 22.6%               | -0.003<br>(0.782)                 | 58.9%                           | 60.0%               | 67.7%               | 31.3%               | 50.0%               | 58.8%               | 62.5%               | 0.014<br>(0.454)         |       |  |  |  |  |  |  |  |

**Supplemental Table 1 cont** Baseline characteristics by sugar-sweetened beverage intake.

|                                            | 49<br>(22.6%)       | 0<br>(0%)           | 47<br>(21.7%)       | 47<br>(21.7%)       | 38<br>(17.5%)       | 10<br>(4.6%)        | 26<br>(12.0%)       | -<br>(0.007)                       | 71<br>(22.0%)       | 4<br>(1.2%)         | 58<br>(18.0%)       | 57<br>(17.7%)       | 46<br>(14.3%)       | 35<br>(10.8%)       | 52<br>(16.1%)       | -                 |  |
|--------------------------------------------|---------------------|---------------------|---------------------|---------------------|---------------------|---------------------|---------------------|------------------------------------|---------------------|---------------------|---------------------|---------------------|---------------------|---------------------|---------------------|-------------------|--|
| <b>NZ Pacific Island</b>                   |                     |                     |                     |                     |                     |                     |                     |                                    |                     |                     |                     |                     |                     |                     |                     |                   |  |
| Number of individuals (%)                  | 49<br>(22.6%)       | 0<br>(0%)           | 47<br>(21.7%)       | 47<br>(21.7%)       | 38<br>(17.5%)       | 10<br>(4.6%)        | 26<br>(12.0%)       | -<br>(0.007)                       | 71<br>(22.0%)       | 4<br>(1.2%)         | 58<br>(18.0%)       | 57<br>(17.7%)       | 46<br>(14.3%)       | 35<br>(10.8%)       | 52<br>(16.1%)       | -                 |  |
| Age, mean (range), years                   | 45<br>(21-85)       | -                   | 38<br>(18-63)       | 40<br>(17-67)       | 42<br>(18-86)       | 39<br>(19-66)       | 33<br>(18-47)       | -1.403<br>(0.007)                  | 51<br>(22-75)       | 46<br>(27-69)       | 49<br>(26-81)       | 48<br>(22-79)       | 47<br>(20-79)       | 48<br>(18-74)       | 42<br>(22-75)       | -0.798<br>(0.018) |  |
| Sex, % male                                | 53.1%               | -                   | 55.3%               | 55.3%               | 56.8%               | 50.0%               | 80.8%               | -0.060<br>(0.006)                  | 80.8%               | 80.0%               | 82.8%               | 93.0%               | 93.6%               | 91.7%               | 88.5%               | -0.005<br>(0.594) |  |
| BMI, mean (range)                          | 33.0<br>(19.4-50.3) | -                   | 34.7<br>(23.4-54.8) | 35.5<br>(20.5-65.1) | 35.8<br>(23.4-54.9) | 37.9<br>(31.5-42.6) | 35.9<br>(24.7-47.9) | 0.916<br>(0.004)                   | 35.3<br>(24.0-53.5) | 34.1<br>(21.5-42.9) | 35.6<br>(26.3-52.5) | 36.0<br>(27.0-54.6) | 36.1<br>(26.0-51.6) | 35.4<br>(24.7-52.8) | 38.2<br>(26.1-55.0) | 0.241<br>(0.308)  |  |
| Uric acid, mean (range)                    | 0.35<br>(0.26-0.48) | -                   | 0.37<br>(0.20-0.55) | 0.38<br>(0.27-0.55) | 0.39<br>(0.17-0.57) | 0.36<br>(0.23-0.45) | 0.41<br>(0.26-0.57) | 0.005<br>(0.115)                   | 0.44<br>(0.18-0.70) | 0.43<br>(0.27-0.52) | 0.44<br>(0.17-0.64) | 0.45<br>(0.29-0.63) | 0.48<br>(0.26-0.68) | 0.46<br>(0.22-0.70) | 0.50<br>(0.20-0.65) | 0.012<br>(0.003)  |  |
| Alcohol intake, mean servings/week (range) | 4.5<br>(0-36)       | -                   | 2.6<br>(0-35)       | 3.3<br>(0-27)       | 2.4<br>(0-20)       | 8<br>(0-37)         | 6.3<br>(0-48)       | -0.083<br>(0.795)                  | 2.4<br>(0-24)       | 6.6<br>(0-32)       | 3.1<br>(0-24)       | 3.2<br>(0-33)       | 4.9<br>(0-23)       | 3.4<br>(0-18)       | 6.6<br>(0-30)       | 0.341<br>(0.273)  |  |
| Kidney problems, %                         | 0%                  | -                   | 0%                  | 4.4%                | 2.9%                | 10.0%               | 0%                  | 0.015<br>(0.015)                   | 23.9%               | 20.0%               | 18.2%               | 7.6%                | 6.4%                | 8.6%                | 4.0%                | -0.019<br>(0.050) |  |
| High blood pressure, %                     | 22.9%               | -                   | 15.2%               | 17.4%               | 13.5%               | 20.0%               | 0%                  | -0.024<br>(0.108)                  | 62.5%               | 20.0%               | 46.4%               | 48.2%               | 37.0%               | 44.1%               | 42.3%               | -0.011<br>(0.462) |  |
| <b>ARIC</b>                                |                     |                     |                     |                     |                     |                     |                     |                                    |                     |                     |                     |                     |                     |                     |                     |                   |  |
| Number of individuals (%)                  | 537<br>(7.8%)       | 3264<br>(47.1%)     | 2255<br>(32.6%)     | 584<br>(8.5%)       | 150<br>(2.2%)       | 16<br>(0.2%)        | 121<br>(1.7%)       | -                                  | 7<br>(4.7%)         | 74<br>(50.0%)       | 44<br>(29.7%)       | 12<br>(8.1%)        | 7<br>(4.7%)         | 0<br>(0%)           | 4<br>(2.7%)         | -                 |  |
| Age, mean (range), years                   | 54.5<br>(44-65)     | 53.7<br>(44-65)     | 54<br>(44-65)       | 53<br>(44-65)       | 53<br>(45-64)       | 49<br>(45-64)       | 51<br>(44-64)       | -0.503<br>(3.6x10 <sup>-14</sup> ) | 55<br>(45-63)       | 55<br>(45-65)       | 55<br>(46-64)       | 54.4<br>(46-63)     | 51<br>(45-61)       | -                   | 49<br>(45-55)       | -0.699<br>(0.068) |  |
| Sex, % male                                | 34.6%               | 45.3%               | 47.7%               | 56.7%               | 60.7%               | 62.5%               | 55.4%               | -0.057<br>(1.7x10 <sup>-23</sup> ) | 71.4%               | 67.6%               | 81.8%               | 91.7%               | 85.7%               | -                   | 75.0%               | -0.047<br>(0.104) |  |
| BMI, mean (range)                          | 26.2<br>(14.9-44.6) | 26.4<br>(14.4-54.6) | 26.2<br>(16.2-54.5) | 26.4<br>(17.3-46.5) | 27.1<br>(18.8-53.8) | 25.6<br>(19.4-30.7) | 26.1<br>(17.1-41.1) | -0.100<br>(0.058)                  | 30.6<br>(25.6-36.7) | 28.1<br>(21.6-40.0) | 27.0<br>(21.1-40.5) | 29.0<br>(23.1-39.9) | 28.6<br>(21.6-37.7) | -                   | 27.4<br>(25.9-30.4) | -0.303<br>(0.281) |  |
| Uric acid, mean (range)                    | 0.32<br>(0.12-0.57) | 0.33<br>(0.09-0.67) | 0.34<br>(0.03-0.71) | 0.34<br>(0.11-0.70) | 0.37<br>(0.07-0.55) | 0.35<br>(0.18-0.57) | 0.35<br>(0.15-0.63) | 0.004<br>(5.0x10 <sup>-7</sup> )   | 0.44<br>(0.28-0.52) | 0.40<br>(0.22-0.60) | 0.42<br>(0.11-0.64) | 0.45<br>(0.26-0.56) | 0.51<br>(0.35-0.69) | -                   | 0.41<br>(0.31-0.55) | 0.010<br>(0.089)  |  |
| Alcohol intake, mean servings/week (range) | 3.2<br>(0-45)       | 3.5<br>(0-63)       | 3.2<br>(0-93)       | 3.5<br>(0-56)       | 2.7<br>(0-30)       | 4.0<br>(0-36)       | 4.7<br>(0-70)       | -0.136<br>(0.080)                  | 2.6<br>(0-17)       | 5.9<br>(0-34)       | 5.4<br>(0-43)       | 8.3<br>(0-30)       | 4.4<br>(0-12)       | -                   | 5.5<br>(0-16)       | -0.544<br>(0.355) |  |
| Kidney problems, %                         | 1.4%                | 1.0%                | 1.4%                | 1.1%                | 0.7%                | 0%                  | 0%                  | -0.001<br>(0.435)                  | 0%                  | 0%                  | 2.3%                | 0%                  | 14.3%               | -                   | 0%                  | 0.011<br>(0.169)  |  |
| High blood pressure, %                     | 12.7%               | 12.1%               | 13.2%               | 13.5%               | 12.0%               | 13.3%               | 8.3%                | 0.000<br>(0.994)                   | 57.1%               | 16.2%               | 18.2%               | 33.3%               | 14.3%               | -                   | 25.0%               | -0.001<br>(0.965) |  |

Individual variables analysed by linear regression for association with SSB (as a continuous variable).

<sup>1</sup> Regression coefficients are adjusted by age, sex, BMI, alcohol (continuous variable), fruit intake (continuous variable), kidney disease, high blood pressure, and relatedness (ARIC only; 501/7075 were related) except when the variable was the dependent variable.

**Supplemental Table 2.** Individual adjustments of the odds ratios for SSB intake and risk of gout

|                               | Obs  | Frequency of SSB (servings/day) |                  |                  |                  |                   |                      |                  |                      | ≥4.0 <sup>1</sup>    | P <sub>Trend</sub> <sup>2</sup> |
|-------------------------------|------|---------------------------------|------------------|------------------|------------------|-------------------|----------------------|------------------|----------------------|----------------------|---------------------------------|
|                               |      | 0                               | 0.01-0.99        | 1.00-1.99        | 2.00-2.99        | 3.00-3.99         | 4.00-4.99            | 5.00+            |                      |                      |                                 |
| <b>Unadjusted</b>             |      |                                 |                  |                  |                  |                   |                      |                  |                      |                      |                                 |
| NZ Caucasian OR (95% CI)      | 592  | 1                               | 1.53 (0.31-7.49) | 0.79 (0.52-1.21) | 1.51 (0.78-2.93) | 0.65 (0.30-1.41)  | 3.93 (0.89-17.26)    | 1.06 (0.43-2.64) | 1.70 (0.79-3.67)     | 0.56                 |                                 |
| P                             |      | -                               | 0.6              | 0.28             | 0.22             | 0.28              | 0.07                 | 0.9              | 0.18                 |                      |                                 |
| NZ Maori OR (95% CI)          | 502  | 1                               | 1.14 (0.35-3.73) | 0.66 (0.40-1.08) | 0.69 (0.36-1.33) | 1.22 (0.63-2.36)  | 1.94 (0.91-4.17)     | 1.34 (0.74-2.43) | 1.53 (0.92-2.54)     | 0.17                 |                                 |
| P                             |      | -                               | 0.83             | 0.1              | 0.27             | 0.56              | 0.088                | 0.33             | 0.1                  |                      |                                 |
| NZ Pacific Island OR (95% CI) | 536  | 1                               | -                | 0.85 (0.50-1.45) | 0.84 (0.49-1.42) | 0.84 (0.48-1.47)  | 2.42 (1.09-5.33)     | 1.38 (0.76-2.50) | 1.67 (0.98-2.84)     | 0.16                 |                                 |
| P                             |      | -                               | -                | 0.55             | 0.51             | 0.53              | 0.029                | 0.29             | 0.06                 |                      |                                 |
| ARIC OR (95% CI)              | 7059 | 1                               | 1.74 (0.80-3.80) | 1.50 (0.67-3.34) | 1.58 (0.62-4.03) | 3.58 (1.24-10.37) | -                    | 2.54 (0.73-8.80) | 2.24 (0.65-7.76)     | 0.2                  |                                 |
| P                             |      | -                               | 0.17             | 0.33             | 0.34             | 0.019             | -                    | 0.14             | 0.2                  |                      |                                 |
| <b>Age</b>                    |      |                                 |                  |                  |                  |                   |                      |                  |                      |                      |                                 |
| NZ Caucasian OR (95% CI)      | 592  | 1                               | 1.78 (0.33-9.49) | 1.02 (0.60-1.71) | 2.59 (1.16-5.80) | 2.08 (0.75-5.76)  | 6.26 (1.11-35.35)    | 2.19 (0.71-6.77) | 3.13 (1.23-7.96)     | 0.005                |                                 |
| P                             |      | -                               | 0.5              | 0.95             | 0.02             | 0.16              | 0.038                | 0.17             | 0.017                |                      |                                 |
| NZ Maori OR (95% CI)          | 501  | 1                               | 1.46 (0.42-5.07) | 1.21 (0.69-2.14) | 1.38 (0.66-2.89) | 2.09 (0.98-4.49)  | 4.94 (2.06-11.86)    | 2.72(1.38-5.36)  | 3.33 (1.84-6.03)     | 1.0x10 <sup>-4</sup> |                                 |
| P                             |      | -                               | 0.55             | 0.51             | 0.4              | 0.058             | 3.6x10 <sup>-4</sup> | 0.004            | 7.2x10 <sup>-5</sup> |                      |                                 |
| NZ Pacific Island OR (95% CI) | 535  | 1                               | -                | 1.08 (0.61-1.89) | 1.07 (0.61-1.88) | 1.05 (0.57-1.90)  | 3.18 (1.37-7.35)     | 2.37 (1.25-4.51) | 2.61 (1.47-4.65)     | 0.005                |                                 |
| P                             |      | -                               | -                | 0.8              | 0.81             | 0.89              | 0.007                | 0.008            | 0.001                |                      |                                 |
| ARIC OR (95% CI)              | 7059 | 1                               | 1.78 (0.81-3.88) | 1.51 (0.68-3.38) | 1.64 (0.64-4.19) | 3.74 (1.29-10.85) | -                    | 2.74 (0.79-9.55) | 2.44 (0.70-8.48)     | 0.16                 |                                 |
| P                             |      | -                               | 0.15             | 0.31             | 0.31             | 0.015             | -                    | 0.11             | 0.16                 |                      |                                 |
| <b>Sex</b>                    |      |                                 |                  |                  |                  |                   |                      |                  |                      |                      |                                 |
| NZ Caucasian OR (95% CI)      | 590  | 1                               | 1.04 (0.20-5.35) | 0.76 (0.48-1.19) | 1.22 (0.61-2.44) | 0.49 (0.22-1.09)  | 3.03 (0.67-13.77)    | 0.73 (0.28-1.87) | 1.22 (0.55-2.72)     | 0.6                  |                                 |
| P                             |      | -                               | 0.96             | 0.22             | 0.57             | 0.081             | 0.15                 | 0.51             | 0.62                 |                      |                                 |
| NZ Maori OR (95% CI)          | 498  | 1                               | 0.65 (0.18-2.42) | 0.57 (0.32-1.01) | 0.45 (0.22-0.96) | 0.56 (0.27-1.19)  | 1.45 (0.61-3.49)     | 0.79 (0.40-1.56) | 0.98 (0.55-1.75)     | 0.49                 |                                 |
| P                             |      | -                               | 0.52             | 0.056            | 0.038            | 0.13              | 0.4                  | 0.51             | 0.95                 |                      |                                 |

|                                    |      |   |                  |                  |                  |                   |                   |                  |                  |      |
|------------------------------------|------|---|------------------|------------------|------------------|-------------------|-------------------|------------------|------------------|------|
| NZ Pacific Island OR (95% CI)      |      | 1 | -                | 0.82 (0.47-1.45) | 0.73 (0.41-1.29) | 0.72(0.39-1.32)   | 2.13 (0.92-4.92)  | 1.06 (0.56-2.00) | 1.34 (0.76-2.37) |      |
| P                                  | 535  | - | -                | 0.5              | 0.28             | 0.29              | 0.078             | 0.86             | 0.31             | 0.65 |
| ARIC OR (95% CI)                   |      | 1 | 1.53 (0.70-3.35) | 1.28 (0.57-2.86) | 1.22 (0.48-3.15) | 2.68 (0.92-7.80)  | -                 | 2.00 (0.57-6.99) | 1.75 (0.50-6.11) |      |
| P                                  | 7059 | - | 0.29             | 0.55             | 0.68             | 0.071             | -                 | 0.28             | 0.38             | 0.52 |
| <b>BMI</b>                         |      |   |                  |                  |                  |                   |                   |                  |                  |      |
| NZ Caucasian OR (95% CI)           |      | 1 | 1.32 (0.26-6.61) | 0.81 (0.53-1.25) | 1.43 (0.73-2.79) | 0.66 (0.30-1.43)  | 3.77 (0.85-16.66) | 1.00 (0.40-2.52) | 1.62 (0.74-3.52) |      |
| P                                  | 582  | - | 0.74             | 0.35             | 0.3              | 0.29              | 0.08              | 0.99             | 0.22             | 0.64 |
| NZ Maori OR (95% CI)               |      | 1 | 0.99 (0.30-3.27) | 0.65 (0.39-1.09) | 0.70 (0.36-1.36) | 1.09 (0.56-2.14)  | 1.75 (0.81-3.79)  | 1.21(0.81-2.23)  | 1.38 (0.82-2.32) |      |
| P                                  | 496  | - | 0.98             | 0.1              | 0.3              | 0.8               | 0.16              | 0.53             | 0.22             | 0.34 |
| NZ Pacific Island OR (95% CI)      |      | 1 | -                | 0.90 (0.52-1.55) | 0.78 (0.45-1.34) | 0.81 (0.45-1.44)  | 2.60 (1.14-5.93)  | 1.22 (0.66-2.24) | 1.57 (0.91-2.71) |      |
| P                                  | 526  | - | -                | 0.7              | 0.36             | 0.47              | 0.024             | 0.52             | 0.1              | 0.31 |
| ARIC OR (95% CI)                   |      | 1 | 1.53 (0.70-3.35) | 1.28 (0.57-2.86) | 1.22 (0.48-4.15) | 2.68 (0.92-7.80)  | -                 | 2.00 (0.57-6.99) | 2.29 (0.66-7.95) |      |
| P                                  | 7057 | - | 0.29             | 0.55             | 0.68             | 0.071             | -                 | 0.28             | 0.19             | 0.18 |
| <b>Alcohol Intake (continuous)</b> |      |   |                  |                  |                  |                   |                   |                  |                  |      |
| NZ Caucasian OR (95% CI)           |      | 1 | 1.49 (0.30-7.30) | 0.79 (0.51-1.20) | 1.47 (0.76-2.86) | 0.62 (0.29-1.35)  | 3.86 (0.88-17.00) | 1.01 (0.40-2.52) | 1.64 (0.76-3.55) |      |
| P                                  | 592  | - | 0.63             | 0.27             | 0.25             | 0.23              | 0.074             | 0.99             | 0.21             | 0.66 |
| NZ Maori OR (95% CI)               |      | 1 | 1.07 (0.32-3.56) | 0.62 (0.37-1.03) | 0.70 (0.36-1.34) | 1.16 (0.59-2.27)  | 1.89 (0.88-4.08)  | 1.30 (0.71-2.37) | 1.48 (0.89-2.48) |      |
| P                                  | 502  | - | 0.91             | 0.065            | 0.29             | 0.66              | 0.11              | 0.39             | 0.13             | 0.21 |
| NZ Pacific Island OR (95% CI)      |      | 1 | -                | 0.87 (0.51-1.47) | 0.85 (0.50-1.44) | 0.83 (0.47-1.46)  | 2.42 (1.09-5.33)  | 1.34 (0.74-2.44) | 1.64 (0.96-2.80) |      |
| P                                  | 536  | - | -                | 0.6              | 0.54             | 0.51              | 0.029             | 0.34             | 0.069            | 0.2  |
| ARIC OR (95% CI)                   |      | 1 | 1.72 (0.79-3.76) | 1.49 (0.67-3.32) | 1.54 (0.60-3.95) | 3.66 (1.26-10.62) | -                 | 2.27 (0.65-7.96) | 2.01 (0.58-7.04) |      |
| P                                  | 7059 | - | 0.17             | 0.33             | 0.37             | 0.017             | -                 | 0.2              | 0.27             | 0.24 |
| <b>Fruit Intake (continuous)</b>   |      |   |                  |                  |                  |                   |                   |                  |                  |      |
| NZ Caucasian OR (95% CI)           |      | 1 | 1.54 (0.31-7.56) | 0.83 (0.54-1.28) | 1.51 (0.78-2.92) | 0.67 (0.31-1.44)  | 3.83 (0.87-16.85) | 1.09 (0.44-2.72) | 1.70 (0.79-3.69) |      |
| P                                  | 589  | - | 0.59             | 0.41             | 0.23             | 0.31              | 0.076             | 0.86             | 0.18             | 0.5  |
| NZ Maori OR (95% CI)               |      | 1 | 1.16 (0.35-3.81) | 0.64 (0.38-1.06) | 0.69(0.36-1.32)  | 1.21 (0.62-2.35)  | 1.93 (0.90-4.15)  | 1.38 (0.76-2.52) | 1.56 (0.84-2.60) |      |
|                                    | 498  |   |                  |                  |                  |                   |                   |                  |                  | 0.16 |



|                               |      |   |                   |                  |                  |                   |                   |                  |                  |       |
|-------------------------------|------|---|-------------------|------------------|------------------|-------------------|-------------------|------------------|------------------|-------|
| P                             |      | - | 0.81              | 0.081            | 0.26             | 0.57              | 0.091             | 0.29             | 0.088            |       |
| NZ Pacific Island OR (95% CI) |      | 1 | -                 | 0.89 (0.52-1.52) | 0.86 (0.51-1.47) | 0.86 (0.49-1.53)  | 2.41 (1.09-5.33)  | 1.57 (0.85-2.90) | 1.82 (1.06-3.14) |       |
| P                             | 526  | - | -                 | 0.67             | 0.27             | 0.61              | 0.03              | 0.15             | 0.03             | 0.094 |
| ARIC OR (95% CI)              |      | 1 | 1.73 (0.79-3.78)  | 1.50 (0.67-3.35) | 1.58 (0.62-4.05) | 3.62 (1.25-10.50) | -                 | 2.53 (0.73-8.78) | 2.24 (0.65-7.75) |       |
| P                             | 7059 | - | 0.17              | 0.32             | 0.34             | 0.018             | -                 | 0.14             | 0.2              | 0.19  |
| <b>Kidney disease</b>         |      |   |                   |                  |                  |                   |                   |                  |                  |       |
| NZ Caucasian OR (95% CI)      |      | 1 | 1.87 (0.38-9.16)  | 0.83 (0.53-1.30) | 1.51 (0.77-2.98) | 0.68 (0.31-1.50)  | 3.83 (0.86-17.13) | 1.27 (0.48-3.40) | 1.91 (0.84-4.35) |       |
| P                             | 579  | - | 0.44              | 0.42             | 0.23             | 0.34              | 0.079             | 0.63             | 0.12             | 0.41  |
| NZ Maori OR (95% CI)          |      | 1 | 0.90 (0.24-3.37)  | 0.65 (0.38-1.10) | 0.79 (0.40-1.53) | 1.16 (0.57-2.35)  | 2.27 (1.02-5.03)  | 1.28 (0.67-2.42) | 1.58 (0.92-2.70) |       |
| P                             | 486  | - | 0.88              | 0.11             | 0.47             | 0.68              | 0.044             | 0.45             | 0.098            | 0.17  |
| NZ Pacific Island OR (95% CI) |      | 1 | -                 | 0.85 (0.49-1.49) | 0.87 (0.50-1.52) | 1.04 (0.58-1.89)  | 2.54 (1.13-5.71)  | 1.60 (0.86-2.98) | 1.87 (1.07-3.26) |       |
| P                             | 514  | - | -                 | 0.57             | 0.62             | 0.89              | 0.024             | 0.14             | 0.027            | 0.043 |
| ARIC OR (95% CI)              |      | 1 | 1.72 (0.79-3.75)  | 1.48 (0.66-3.30) | 1.57 (0.61-4.02) | 3.63 (1.25-10.52) | -                 | 2.64 (0.76-9.18) | 2.31 (0.66-8.00) |       |
| P                             | 6745 | - | 0.17              | 0.34             | 0.35             | 0.018             | -                 | 0.13             | 0.19             | 0.18  |
| <b>High Blood Pressure</b>    |      |   |                   |                  |                  |                   |                   |                  |                  |       |
| NZ Caucasian OR (95% CI)      |      | 1 | 2.55 (0.51-12.84) | 0.85 (0.53-1.36) | 1.69 (0.84-3.41) | 0.75 (0.33-1.73)  | 4.94 (1.09-22.46) | 1.42 (0.55-3.71) | 2.21 (0.99-4.94) |       |
| P                             | 585  | - | 0.26              | 0.49             | 0.15             | 0.5               | 0.039             | 0.47             | 0.054            | 0.19  |
| NZ Maori OR (95% CI)          |      | 1 | 0.83 (0.22-3.10)  | 0.63 (0.36-1.11) | 1.01 (0.50-2.06) | 1.39 (0.66-2.96)  | 2.49 (1.06-5.84)  | 1.14 (0.58-2.25) | 1.51 (0.85-2.68) |       |
| P                             | 488  | - | 0.78              | 0.11             | 0.98             | 0.39              | 0.036             | 0.7              | 0.16             | 0.16  |
| NZ Pacific Island OR (95% CI) |      | 1 | -                 | 1.04 (0.58-1.85) | 1.02 (0.57-1.82) | 1.16 (0.63-2.14)  | 2.91 (1.26-6.74)  | 2.00 (1.05-3.80) | 2.26 (1.27-4.04) |       |
| P                             | 524  | - | -                 | 0.89             | 0.94             | 0.63              | 0.013             | 0.035            | 0.006            | 0.015 |
| ARIC OR (95% CI)              |      | 1 | 1.75 (0.80-3.82)  | 1.50 (0.67-3.34) | 1.58 (0.62-4.05) | 3.60 (1.24-10.42) | -                 | 2.61 (0.75-9.06) | 2.31 (0.67-8.02) |       |
| P                             | 7022 | - | 0.16              | 0.33             | 0.34             | 0.018             | -                 | 0.13             | 0.19             | 0.19  |

1 The 4.0-4.99 and 5+ groups were collapsed and used in logistic regression with the 5 other categorical groups – data reported only for the resultant  $\geq 4$  SSB/day group (in italics).

2  $P_{\text{Trend}}$  was the P value associated with the single line SSB variable in regression analysis.

**Supplemental Table 3** Association analysis of *SLC2A9* genotype and risk of gout

|                       | Genotype (count, freq) <sup>1</sup> |              |             | Minor-allele frequency | Allelic OR <sup>2</sup><br>[95% CI], <i>P</i> | Allelic OR <sup>2</sup><br>[95% CI], <i>P</i> | Hardy-Weinberg<br><i>P</i> |
|-----------------------|-------------------------------------|--------------|-------------|------------------------|-----------------------------------------------|-----------------------------------------------|----------------------------|
|                       | TT                                  | CT           | CC          |                        |                                               |                                               |                            |
| NZ European Caucasian |                                     |              |             |                        |                                               |                                               |                            |
| Case                  | 291 (0.728)                         | 104 (0.260)  | 10 (0.013)  | 0.143                  | 0.58 [0.42-0.81],                             | 0.59 [0.37-0.94],                             | 0.20                       |
| Control               | 105 (0.618)                         | 55 (0.324)   | 10 (0.059)  | 0.221                  | 0.001                                         | 0.027                                         | 0.44                       |
| NZ Maori              |                                     |              |             |                        |                                               |                                               |                            |
| Case                  | 167 (0.903)                         | 15 (0.081)   | 3 (0.016)   | 0.057                  | 0.84 [0.50-1.42],                             | 0.70 [0.32-1.54],                             | 0.001                      |
| Control               | 264 (0.868)                         | 39 (0.128)   | 1 (0.003)   | 0.067                  | 0.52                                          | 0.37                                          | 0.73                       |
| NZ Pacific Island     |                                     |              |             |                        |                                               |                                               |                            |
| Case                  | 303 (0.956)                         | 14 (0.044)   | 0 (0.000)   | 0.022                  | 0.56 [0.27-1.13],                             | 0.35 [0.15-0.83],                             | 0.69                       |
| Control               | 198 (0.925)                         | 15 (0.070)   | 1 (0.005)   | 0.040                  | 0.11                                          | 0.016                                         | 0.24                       |
| ARIC                  |                                     |              |             |                        |                                               |                                               |                            |
| Case                  | 105 (0.709)                         | 39 (0.264)   | 4 (0.027)   | 0.159                  | 0.67 [0.49-0.89],                             | 0.64 [0.47-0.89],                             | 0.87                       |
| Control               | 4200 (0.606)                        | 2414 (0.348) | 313 (0.045) | 0.219                  | 0.012                                         | 0.007                                         | 0.15                       |

1 *rs11942223* genotyped in NZ sample sets; surrogate *rs6449173* (major allele A, minor allele C) –  $r^2=1$  with *rs11942223* in European Caucasian used in ARIC.

2 Unadjusted.

3 Adjusted by age, sex, BMI, alcohol (continuous variable), fruit intake (continuous variable), kidney disease and high blood pressure.
